# Supplementary material
Source: publisher figshare collection journal article supplement (https://acs.figshare.com/ndownloader/files/4697938)
Supplement: Supplementary file 1 [file 4697938]

**Supporting Information Available**

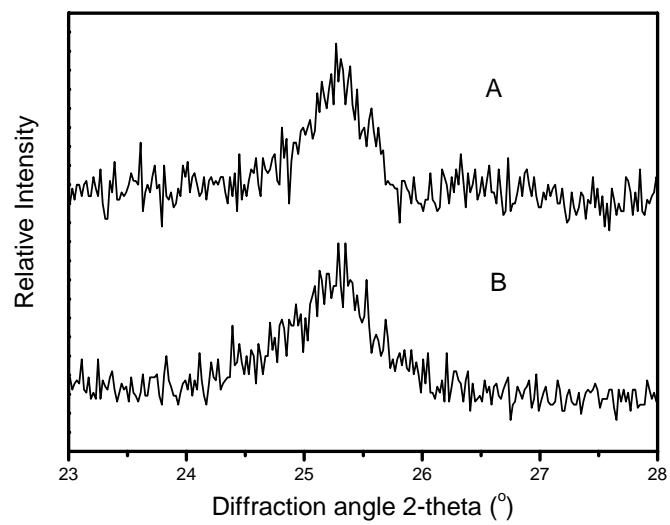

X-ray diffraction peak of crystal plane (101) of the TiO<sub>2</sub> film coated on A SiO<sub>2</sub>-precoated ceramic tile;  
B ceramic tile.
